# Supplementary material
Source: publisher figshare collection journal article supplement (https://acs.figshare.com/ndownloader/files/6329235)

**Demethyleugenol  $\beta$ -glucopyranoside Isolated from *Agastache rugosa* Decreases  
Melanin Synthesis via Downregulation of MITF and SOX9**

Taek Hwan Lee<sup>†</sup>, SeonJu Park<sup>†</sup>, Guijae Yoo<sup>†</sup>, Cheongyun Jang<sup>‡</sup>, Mi-hyun Kim<sup>‡, #</sup>, Seung  
Hyun Kim<sup>†</sup>, Sun Yeou Kim<sup>\*, ‡, Δ, #</sup>

<sup>†</sup>College of Pharmacy, Yonsei University, 85, Songdogwahak-ro, Yeonsu-gu, Incheon  
21983, Republic of Korea

<sup>‡</sup>Lab of Pharmacognosy, College of Pharmacy, Gachon University, 191, Hambakmoero,  
Yeonsu-gu, Incheon 21936, Republic of Korea

<sup>Δ</sup>Gachon Medical Research Institute, Gil Medical Center, Incheon 21565, Republic of  
Korea

<sup>#</sup>Gachon Institute of Pharmaceutical Science, Gachon University, 191, Hambakmoero,  
Yeonsu-gu, Incheon 21936, Republic of Korea

**Corresponding author (Sun Yeou Kim)**

Lab of Pharmacognosy, College of Pharmacy, Gachon University, #191, Hambakmoero,  
Yeonsu-gu, Incheon 21936, Republic of Korea.

\*Tel: +82-32-820-4931, Fax: +82-32-899-8962, E-mail: sunnykim@gachon.ac.kr

**Supplemental figure 1. Docking simulations of the binding complex of SOX9–DNA with compounds 2 -6.** Hydrogen bonds are indicated by yellow-dot lines, disfavored bad contacts are orange-dot lines, and pi–pi interactions are indicated by cyan-dot lines.

**Compound2**

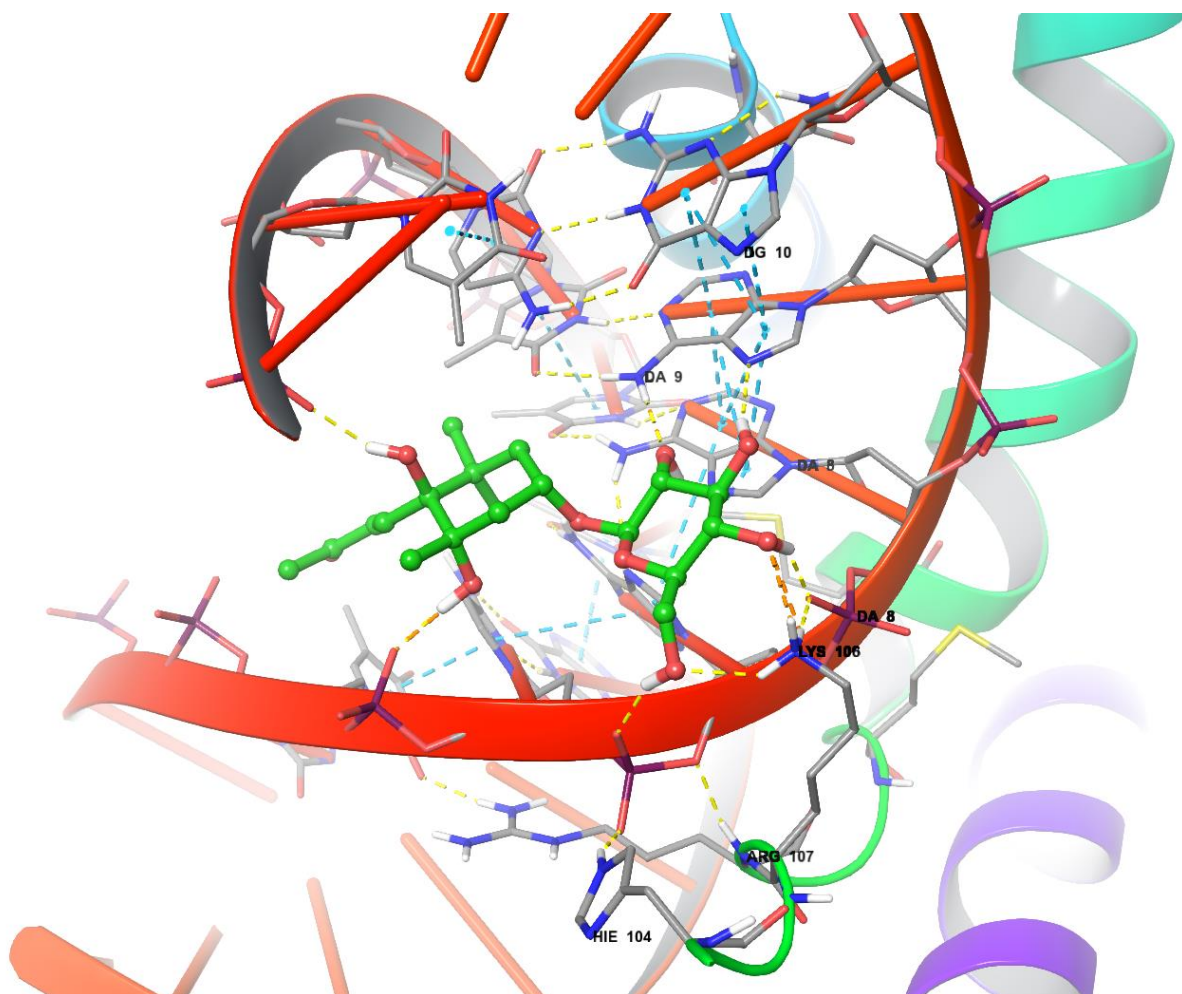

Compound3

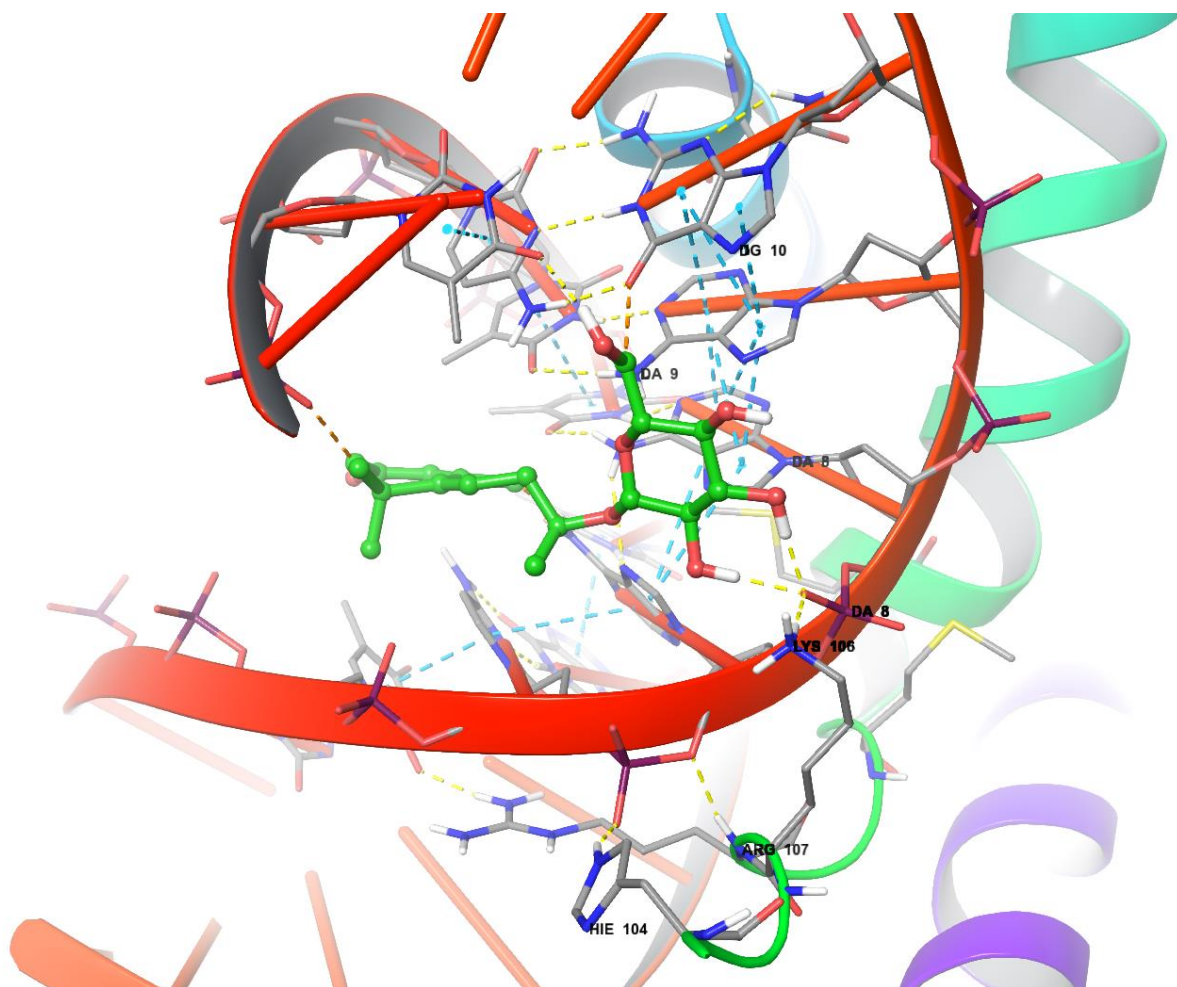

Compound4

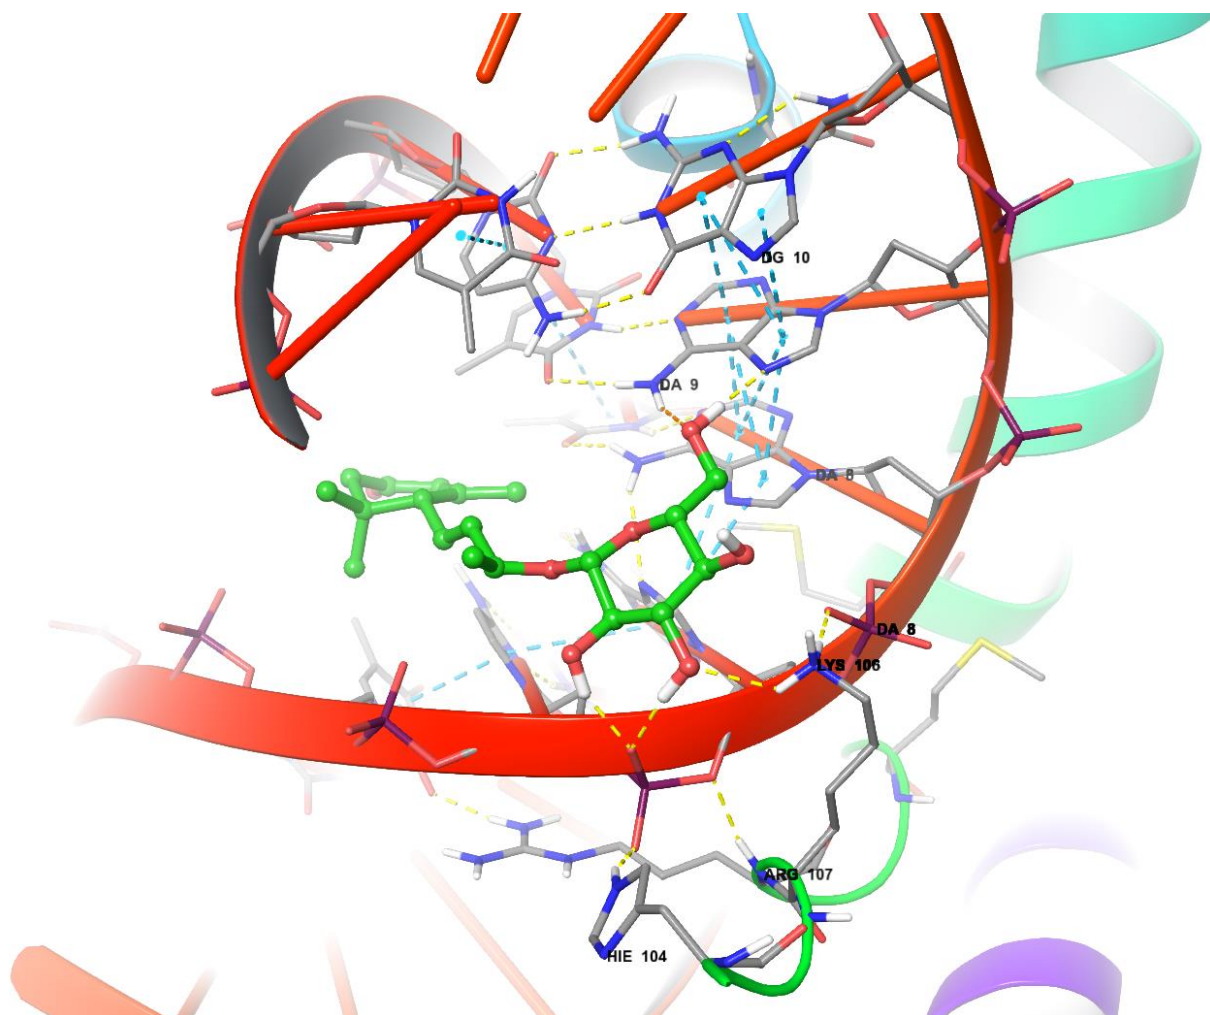

Compound5- representative pose1

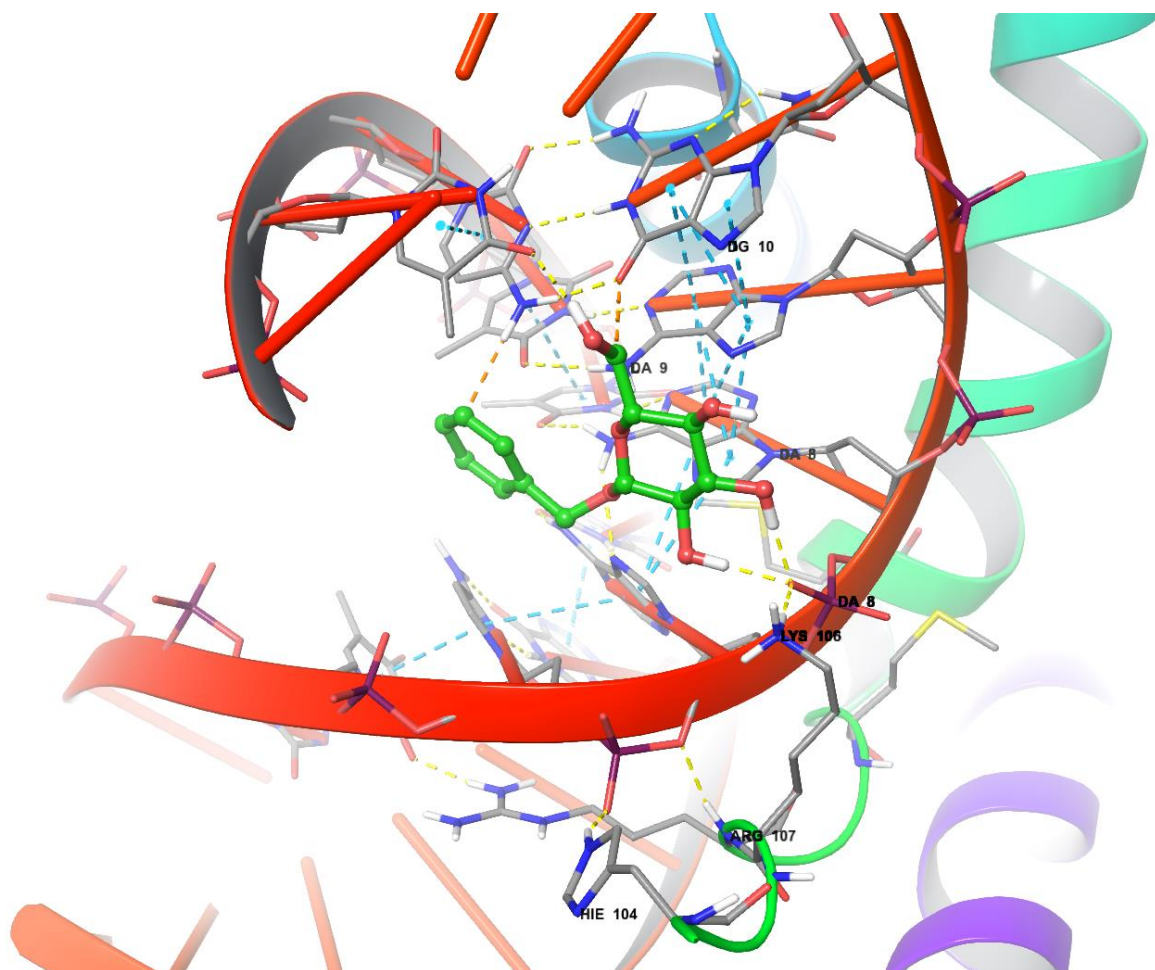



Compound5- representative pose2

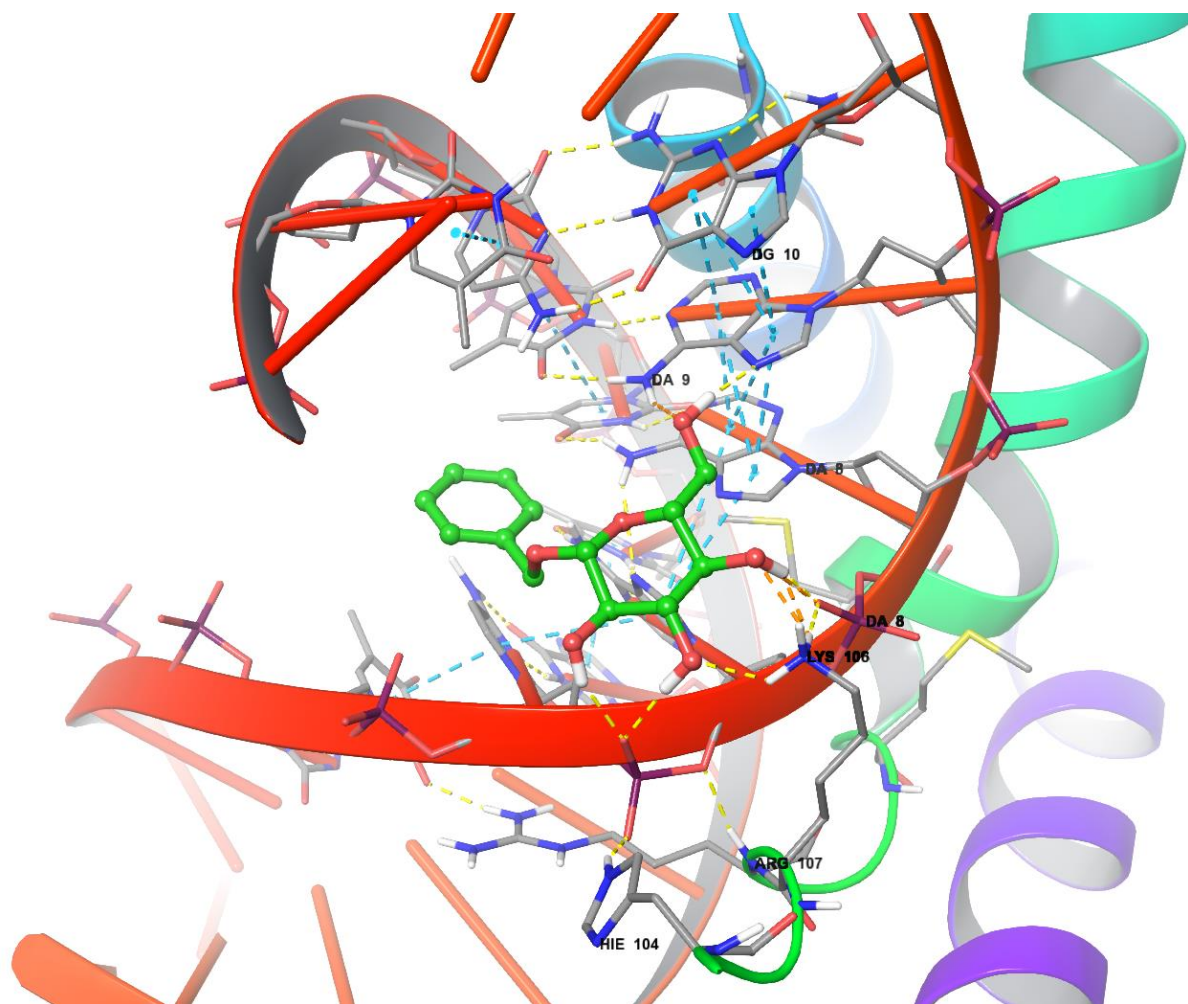

Compound6- representative pose1

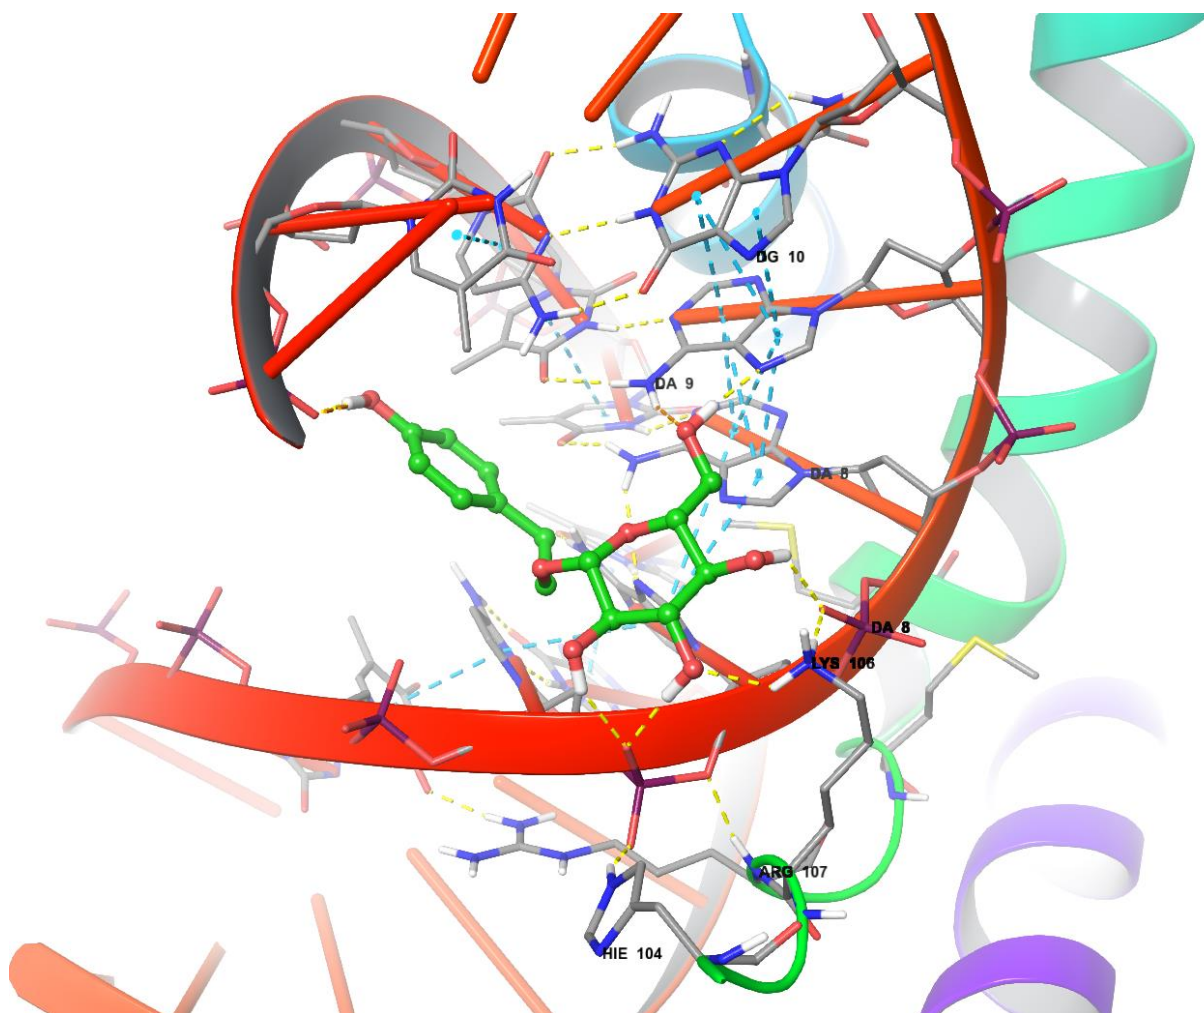

Compound6- representative pose2

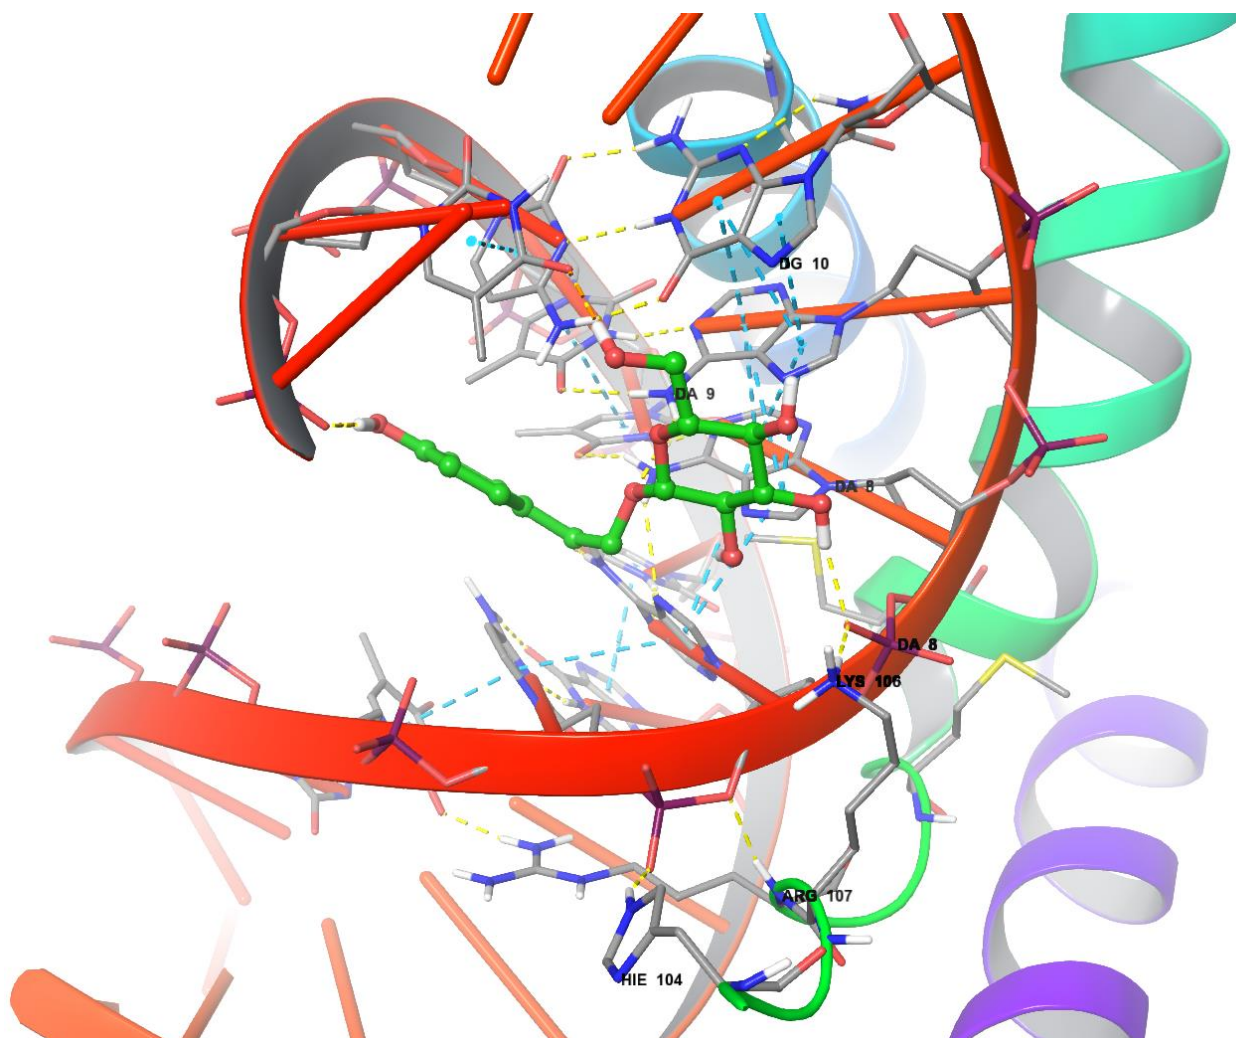

Supplement: Supplementary file 1 [file 6329235]
